# Supplementary material for: Strain in a platinum plate induced by an ultrahigh energy laser boosts the hydrogen evolution reaction
Source: Royal Society of Chemistry journal article supplement (doi:10.1039/d1ra06688a), 2021-01-01
Supplement: d1ra06688a1.pdf [file d1ra06688a1.pdf]

# Supplementary information

## **Strain in a Platinum Plate Induced by an Ultrahigh Energy Laser Boosts the Hydrogen Evolution Reaction**

*Yuqian Huang,<sup>†</sup> Zhiguo Ye,<sup>\*†</sup> Feng Pei,<sup>‡</sup> Guang Ma,<sup>‡</sup> Xinyuan Peng,<sup>†</sup> Duosheng Li.<sup>†</sup>*

<sup>†</sup> School of Material Science and Engineering, Nanchang Hangkong University, 696#, FengHeNan Road, Nanchang 330063, China.

<sup>‡</sup> State Grid JiangXi Electric Power Research Institute, Nanchang, 330096, China

<sup>‡</sup> State Key Laboratory of Advanced Power Transmission Technology (Global Energy Interconnection Research Institute Co.Ltd.), Beijing, 102209, China.

Corresponding Author

\*E-mail: 70125@nchu.edu.cn (Z.G. Ye)

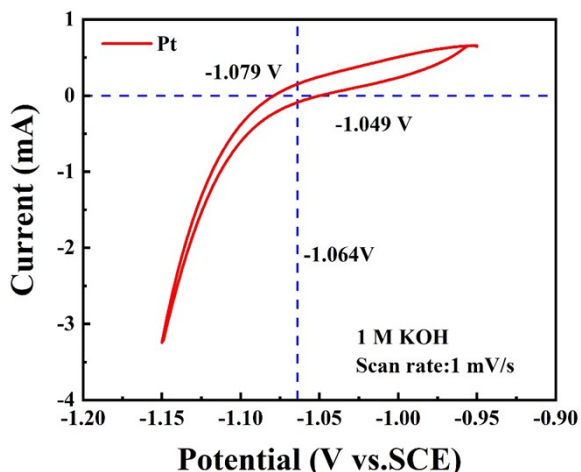

**Figure S1 RHE voltage calibration:** The saturated calomel electrode (SCE) is standardized using the CV method under the traditional three-electrode system. The electrolyte (KOH) had to be charged for 30 minutes with high-purity hydrogen to saturation. During the standardization process, the standard platinum electrode was used as the auxiliary electrode and the working electrode, and the scanning speed was  $1 \text{ mV s}^{-1}$ . When the current density reaches zero, the average of the two potentials are considered to be the thermodynamic potential of the HER. The pH value is 13.95 for a 1 M KOH solution; the results show a zero-current point of -1.064 V in a 1 M KOH solution, which is nearly consistent with the value of -1.070 V estimated from the Nernst equation.

$$E(\text{RHE}) = E(\text{SCE}) + 0.241 + 0.059 \text{ pH} = E(\text{SCE}) + 1.064$$

According to the principle of 1 M KOH,  $E(\text{RHE}) = E(\text{SCE}) + 0.241 + 0.059 \text{ pH} = E(\text{SCE}) + 0.2587$  can be obtained in a 0.5 M  $\text{H}_2\text{SO}_4$  solution.

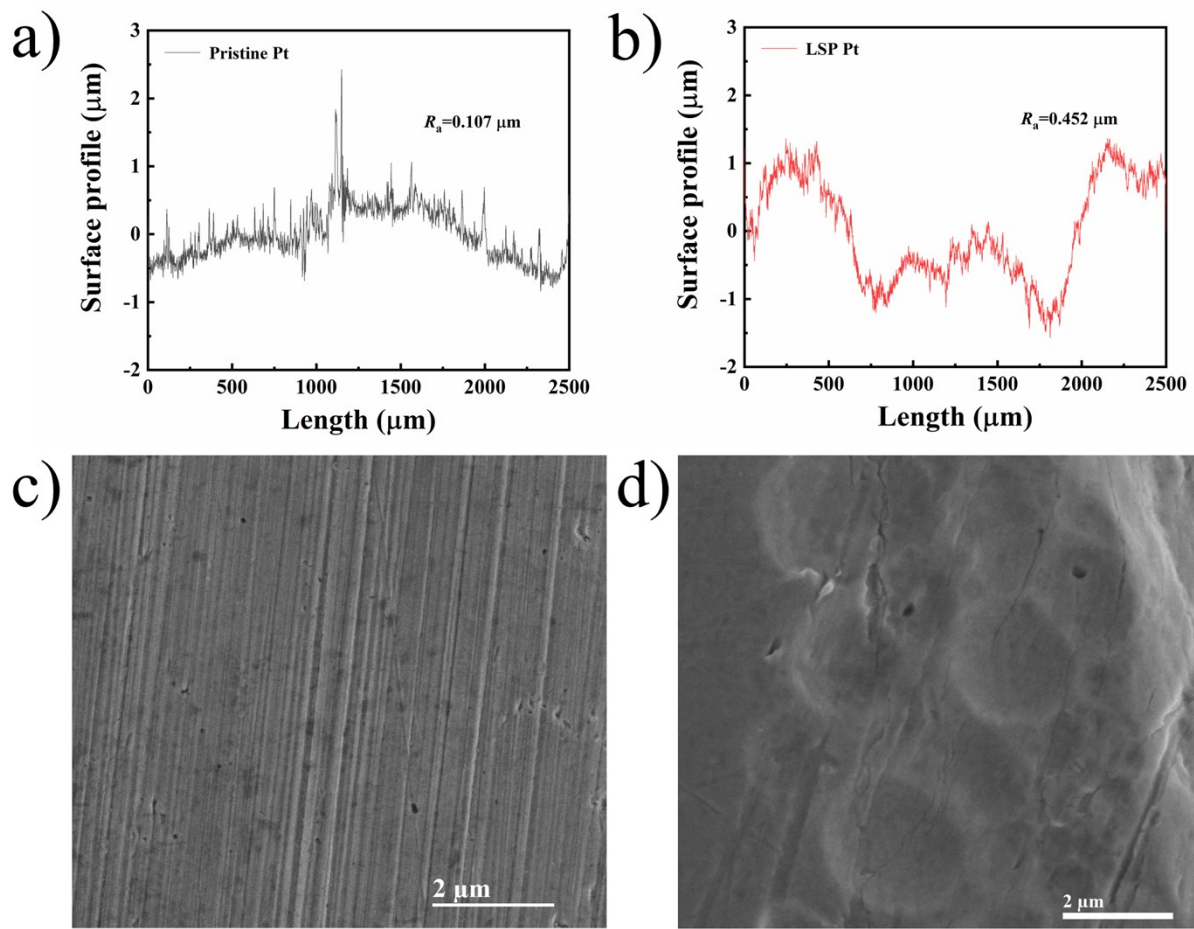

**Figure S2** The  $R_a$  values of (a) pristine Pt and (b) LSP Pt plates. Surface morphologies of (c) pristine Pt and (d) LSP Pt plates.

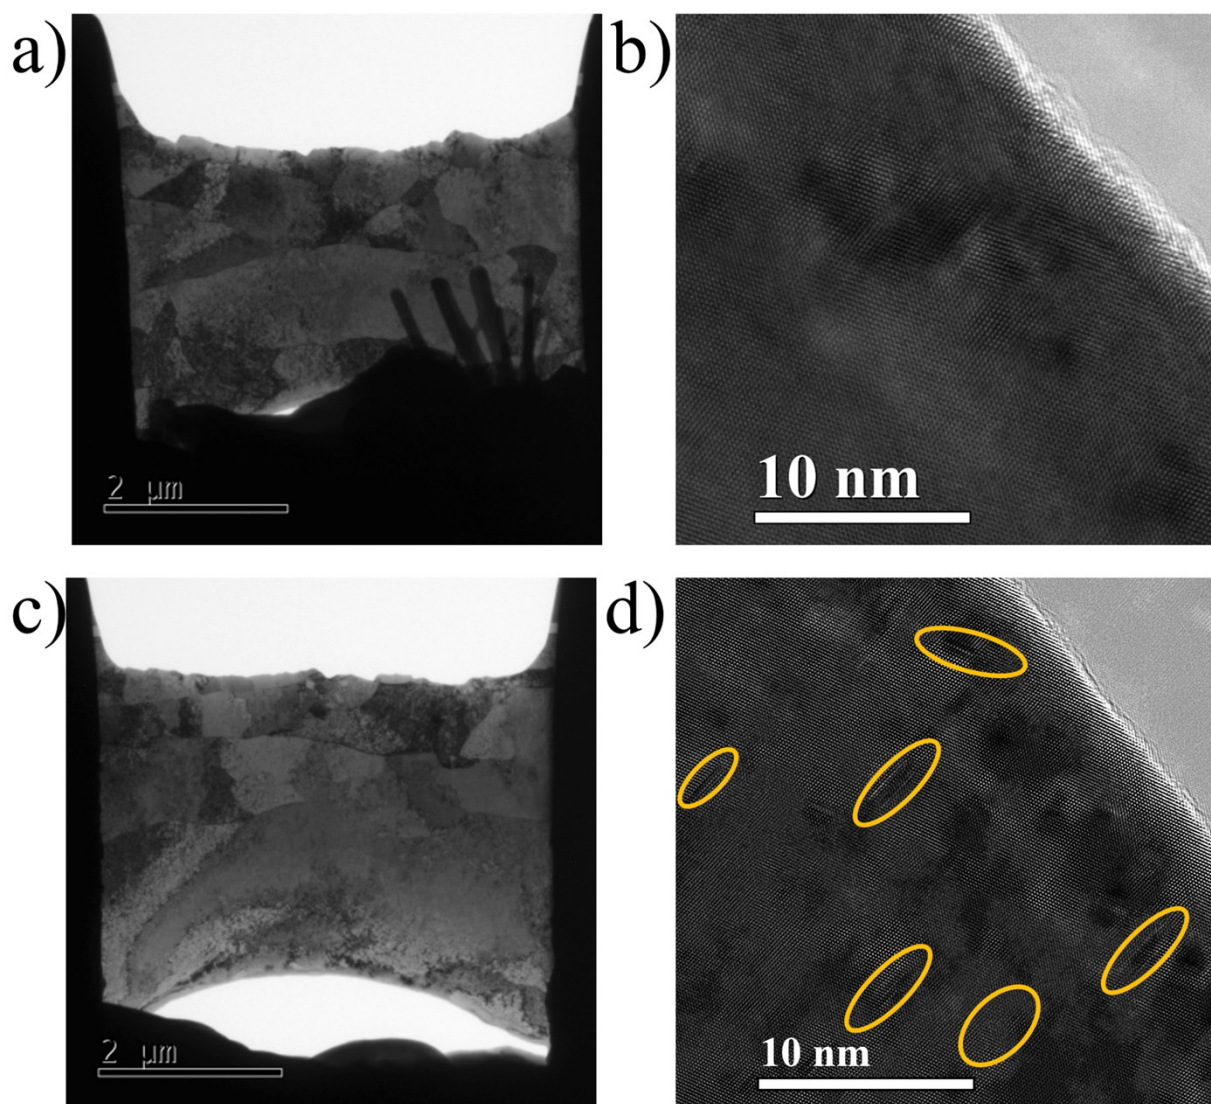

**Figure S3** (a, b) TEM and HRTEM images of pristine Pt plates. (c, d) TEM and HRTEM images of LSP Pt plates.

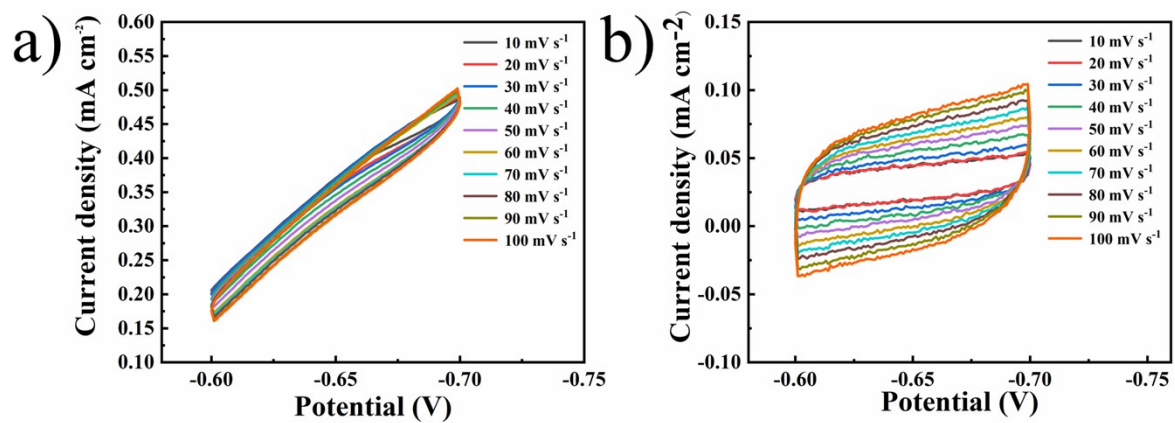

**Figure S4** CV curves of (a) pristine Pt and (b) LSP Pt electrodes in a 1 M KOH solution.

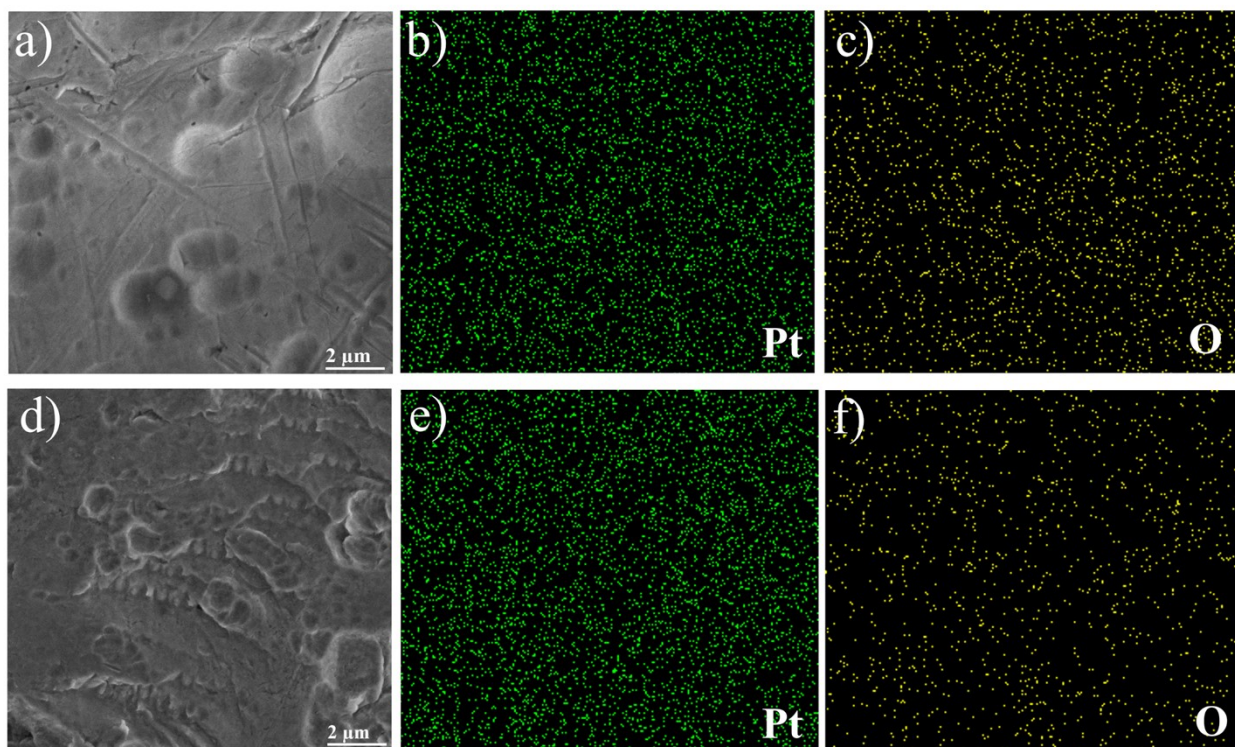

**Figure S5** (a) FESEM images and (b, c) EDS elemental mapping of the LSP Pt electrode after aging for 24 hours at a fixed current density of  $10 \text{ mA cm}^{-2}$  in a  $0.5 \text{ M H}_2\text{SO}_4$  solution. (d) FESEM images and (e, f) EDS elemental mapping of the LSP Pt electrode after aging for 24 hours at a fixed current density of  $10 \text{ mA cm}^{-2}$  in a  $1 \text{ M KOH}$  solution.

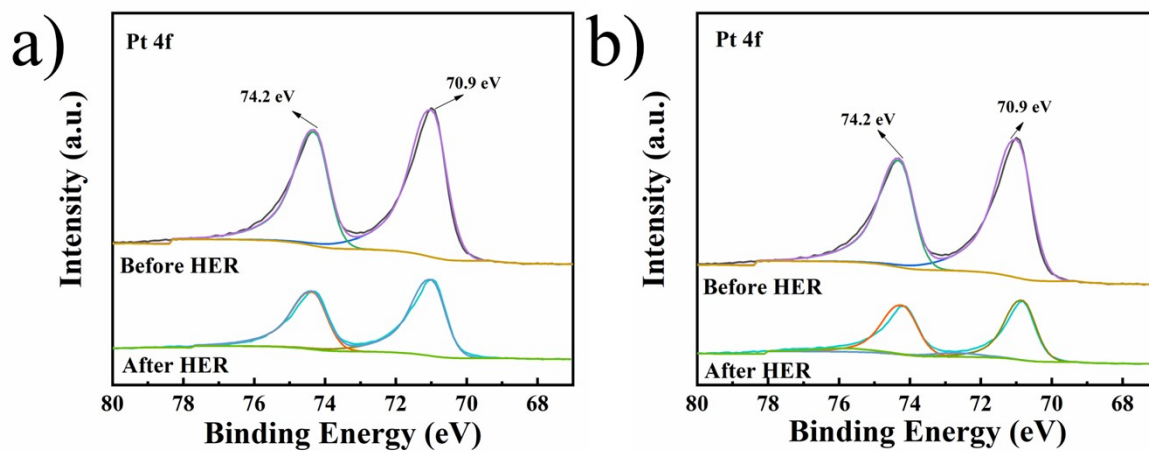

**Figure S6** Pt 4f XPS spectra of the LSP Pt before and after aging for 24 hours in a (a) 0.5 M  $\text{H}_2\text{SO}_4$  and (b) 1 M KOH solution, respectively.

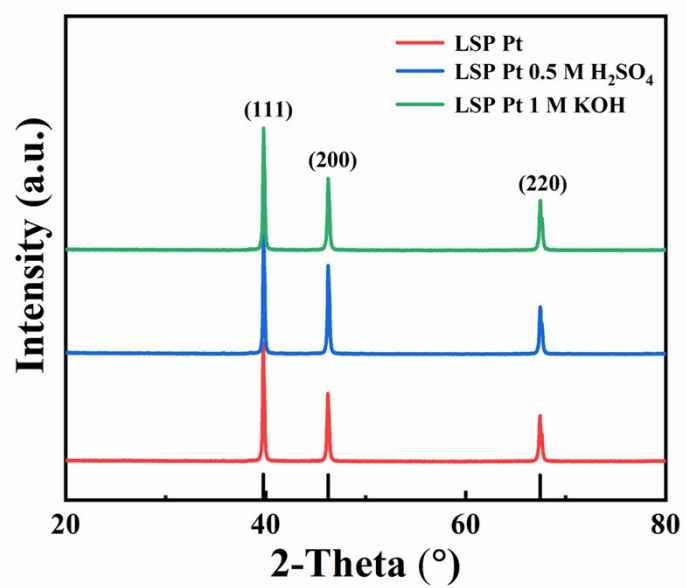

**Figure S7** XRD pattern of the LSP Pt electrode before and after aging for 24 hours in a 0.5 M H<sub>2</sub>SO<sub>4</sub> and 1 M KOH solution.



**Table S1** Summary of fitted EIS data for the pristine and LSP Pt electrodes in a 0.5 M H<sub>2</sub>SO<sub>4</sub> solution.

| Samples     | $R_s$ ( $\Omega$ cm <sup>-2</sup> ) | $Q_{dl}$              | $R_{ct}$ ( $\Omega$ cm <sup>-2</sup> ) |
|-------------|-------------------------------------|-----------------------|----------------------------------------|
| Pristine Pt | 0.85                                | $1.96 \times 10^{-5}$ | 9.2                                    |
| LSP Pt      | 0.79                                | $6.74 \times 10^{-5}$ | 3.5                                    |

**Table S2** Summary of fitted EIS data for the pristine and LSP Pt electrodes in a 1 M KOH solution.

| Samples     | $R_s$ ( $\Omega \text{ cm}^{-2}$ ) | $Q_{dl}$              | $R_{ct}$ ( $\Omega \text{ cm}^{-2}$ ) |
|-------------|------------------------------------|-----------------------|---------------------------------------|
| Pristine Pt | 0.89                               | $1.07 \times 10^{-4}$ | 8.3                                   |
| LSP Pt      | 0.78                               | $2.34 \times 10^{-4}$ | 4.4                                   |

**Table S3** Electrocatalytic performance Comparison of the electrodes for the HER.

| Electrocatalyst                                    | Tafel slope (mV dec <sup>-1</sup> ) | $\eta_{10}$ (mV) | Current density for HER stability (mA cm <sup>-2</sup> ) | HER Stability (h) | Electrolyte                          | Reference    |
|----------------------------------------------------|-------------------------------------|------------------|----------------------------------------------------------|-------------------|--------------------------------------|--------------|
| LSP Pt                                             | 22.7                                | 48               | 10                                                       | >24               | 0.5 M H <sub>2</sub> SO <sub>4</sub> | This work    |
| Pristine Pt                                        | 30.2                                | 79               | 10                                                       | > 24              | 0.5 M H <sub>2</sub> SO <sub>4</sub> | This work    |
| LSP Pt                                             | 65.7                                | 139              | 10                                                       | > 24              | 1 M KOH                              | This work    |
| Pristine Pt                                        | 91.2                                | 264              | 10                                                       | > 24              | 1 M KOH                              | This work    |
| SnS <sub>2</sub> -Pt-3                             | 126                                 | 210              | 10                                                       | > 20              | 0.5 M H <sub>2</sub> SO <sub>4</sub> | <sup>1</sup> |
| Ti <sub>3</sub> C <sub>2</sub> Tx@ <sub>1</sub> Pt | 80                                  | 37               | 10                                                       | > 10              | 0.5 M H <sub>2</sub> SO <sub>4</sub> | <sup>2</sup> |
| Pt-Ag/SiNW                                         | 70                                  | 50               | N/A                                                      | N/A               | 0.5 M H <sub>2</sub> SO <sub>4</sub> | <sup>3</sup> |
| Pt-CQDs/Gr-C400                                    | 40                                  | 27               | N/A                                                      | N/A               | 0.5 M H <sub>2</sub> SO <sub>4</sub> | <sup>4</sup> |
| Pt-MoS <sub>2</sub> /MWCNTs                        | 28                                  | 42               | 10                                                       | 10                | 0.5 M H <sub>2</sub> SO <sub>4</sub> | <sup>5</sup> |
| Pt-MoS <sub>2</sub> /MWCNTs                        | 41                                  | 75               | 10                                                       | 10                | 1 M KOH                              | <sup>5</sup> |
| Pt <sub>1</sub> -Mo <sub>2</sub> C-C               | 64                                  | 155              | 170                                                      | > 20              | 1 M KOH                              | <sup>6</sup> |
| 0.6 Ni-Fe-Pt nanocubes (NCs)                       | 64                                  | 326              | 25                                                       | > 20              | 1 M KOH                              | <sup>7</sup> |
| PtPd@NLS                                           | 23                                  | 29               | N/A                                                      | N/A               | 0.5 M H <sub>2</sub> SO <sub>4</sub> | <sup>8</sup> |
| PtPd@NLS                                           | 97                                  | 46               | 10                                                       | >12               | 0.1 M KOH                            | <sup>8</sup> |

## References

- 1 Y. Yu, J. Xu, J. Zhang, F. Li, J. Fu, C. Li and C. An, *Nanomaterials*, 2020, **10**, 1–11.
- 2 C. Cui, R. Cheng, C. Zhang and X. Wang, *Chinese Chem. Lett.*, 2020, **31**, 988–991.
- 3 W. Shen, B. Wu, F. Liao, B. Jiang and M. Shao, *Int. J. Hydrogen Energy*, 2017, **42**, 15024–15030.
- 4 H. Xiao, J. Zhang, M. Zhao, J. Ma, Y. Li, T. Hu, Z. Zheng, J. Jia and H. Wu, *J. Power Sources*, , DOI:10.1016/j.jpowsour.2020.227770.
- 5 A. Fan, P. Zheng, C. Qin, X. Zhang, X. Dai, D. Ren, X. Fang, C. Luan and J. Yang, *Electrochim. Acta*, , DOI:10.1016/j.electacta.2020.136927.
- 6 S. Niu, J. Yang, H. Qi, Y. Su, Z. Wang, J. Qiu, A. Wang and T. Zhang, *J. Energy Chem.*, 2021, **57**, 371–377.
- 7 M. Fu, Q. Zhang, Y. Sun, G. Ning, X. Fan, H. Wang, H. Lu, Y. Zhang and H. Wang, *Int. J. Hydrogen Energy*, 2020, **45**, 20832–20842.
- 8 F. Wen, Y. Zhang, J. Tan, Z. Zhou, M. Zhu, S. Yin and H. Wang, *J. Electroanal. Chem.*, 2018, **822**, 10–16.
